# Supplementary material
Source: MDPI journal article supplement (https://www.mdpi.com/2504-5377/7/3/56)
Supplement: s1 [file s1]

# Influence of casein and milk phospholipid emulsifiers on the digestion and self-assembled structures of milk lipids

Malinda Salim <sup>1</sup>, Alastair K. H. MacGibbon <sup>2</sup>, Cameron J. Nowell <sup>3</sup>, Andrew J. Clulow <sup>1,4</sup> and Ben J. Boyd <sup>1,5,\*</sup>

<sup>1</sup> Drug Delivery, Disposition and Dynamics, Monash Institute of Pharmaceutical Sciences, Monash University (Parkville Campus), 381 Royal Parade, Parkville, VIC 3052, Australia; malinda.salim@monash.edu (M.S.); ben.boyd@monash.edu (B.J.B.)

<sup>2</sup> Fonterra Research Centre, Private Bag 11 029, Palmerston North 4442, New Zealand; alastair.macgibbon@fonterra.com

<sup>3</sup> Drug Discovery Biology, Monash Institute of Pharmaceutical Sciences, Monash University (Parkville Campus), 381 Royal Parade, Parkville, VIC 3052, Australia; cameron.nowell@monash.edu

<sup>4</sup> Australian Synchrotron, ANSTO, 800 Blackburn Road, Clayton, VIC 3168, Australia; clulowa@ansto.gov.au

<sup>5</sup> Department of Pharmacy, University of Copenhagen, Universitetsparken 2, 2100 Copenhagen, Denmark

\* Correspondence: ben.boyd@monash.edu; Tel.: +61-3-99039112; Fax: +61-3-99039583

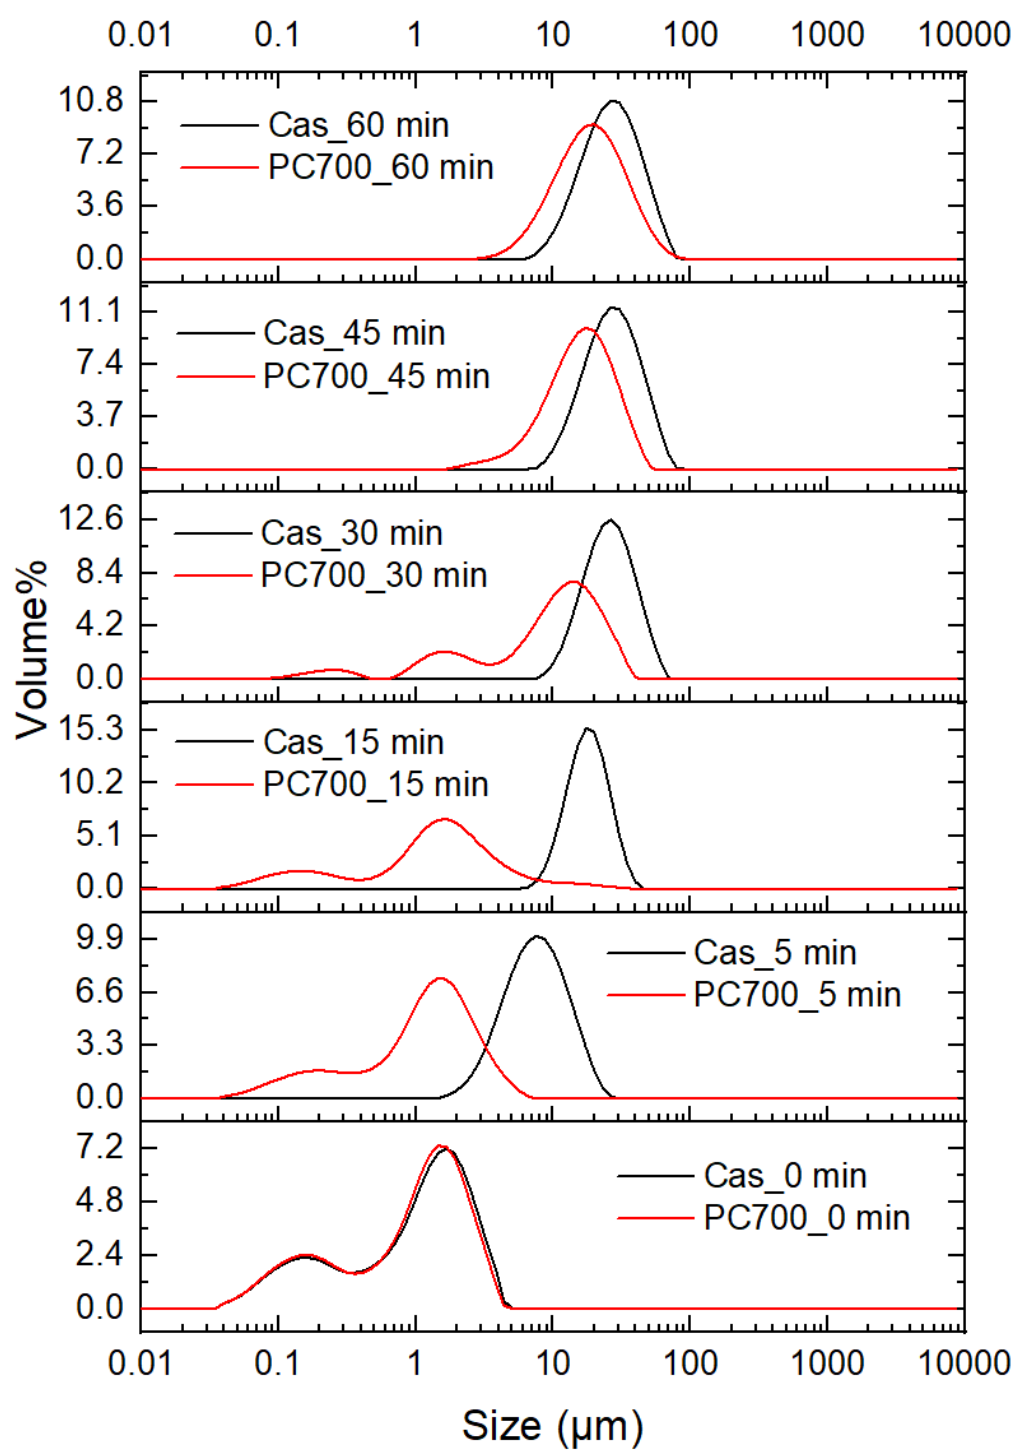

**Figure S1.** Particle size distributions of 2 w/v% casein+AMF and 2 w/v% PC700+AMF emulsions at pH 6.5 before digestion (0 min) and during digestion (up to 60 min) by pancreatic lipase.

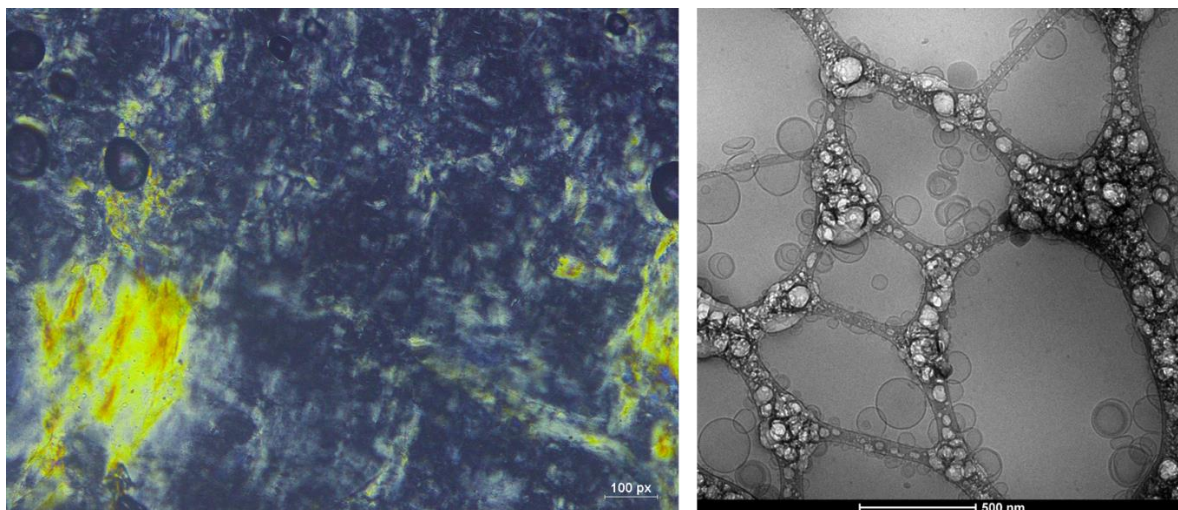

**Figure S2.** Left: Polarised light microscopy image of hydrated bulk milk phospholipids (PC700) in water at 37 °C indicating birefringence lamellar textures. Scale bar: 100 px = 50  $\mu$ m. Right: Cryogenic electron microscopy image of dispersed PC700 showing presence of vesicles.

**Table S1.** Average volume weighted mean particle size ( $D_{4,3}$ ) of anhydrous milk fat (AMF) emulsified with casein and milk phospholipids (PC700) under different conditions: pre-gastric emulsions; emulsions post-pepsin incubation with pH adjusted to pH 6.5 (post-pepsin, pH 6.5); and emulsions post-pepsin and fungal gastric lipase incubation with pH adjusted to 6.5 (post-pepsin + FGL, pH 6.5). Particle size of PC700 emulsified in tris buffer, i.e. no AMF, was also included for comparison. SD is standard deviation from three measurements.

| Sample              | Condition                               | Volume weighted mean ( $D_{4,3}$ )<br>$\pm$ SD, $\mu\text{m}$ |
|---------------------|-----------------------------------------|---------------------------------------------------------------|
| Casein+AMF          | Pre-gastric (emulsion in pH 6.5 buffer) | $1.8 \pm 0.4$                                                 |
|                     | Post-pepsin, pH 6.5                     | $2.3 \pm 0.9$                                                 |
|                     | Post-pepsin + FGL, pH 6.5               | $6.4 \pm 3.3$                                                 |
| PC700+AMF           | Pre-gastric (emulsion in pH 6.5 buffer) | $1.5 \pm 0.4$                                                 |
|                     | Post-pepsin, pH 6.5                     | $2.0 \pm 0.0$                                                 |
|                     | Post-pepsin + FGL, pH 6.5               | $3.3 \pm 1.0$                                                 |
| Casein+PC700+AMF    | Pre-gastric (emulsion in pH 6.5 buffer) | $1.4 \pm 0.4$                                                 |
|                     | Post-pepsin, pH 6.5                     | $3.9 \pm 0.1$                                                 |
|                     | Post-pepsin + FGL, pH 6.5               | $46.0 \pm 22.6$                                               |
| PC700 only (no AMF) | Pre-gastric (emulsion in pH 6.5 buffer) | $1.0 \pm 0.0$                                                 |

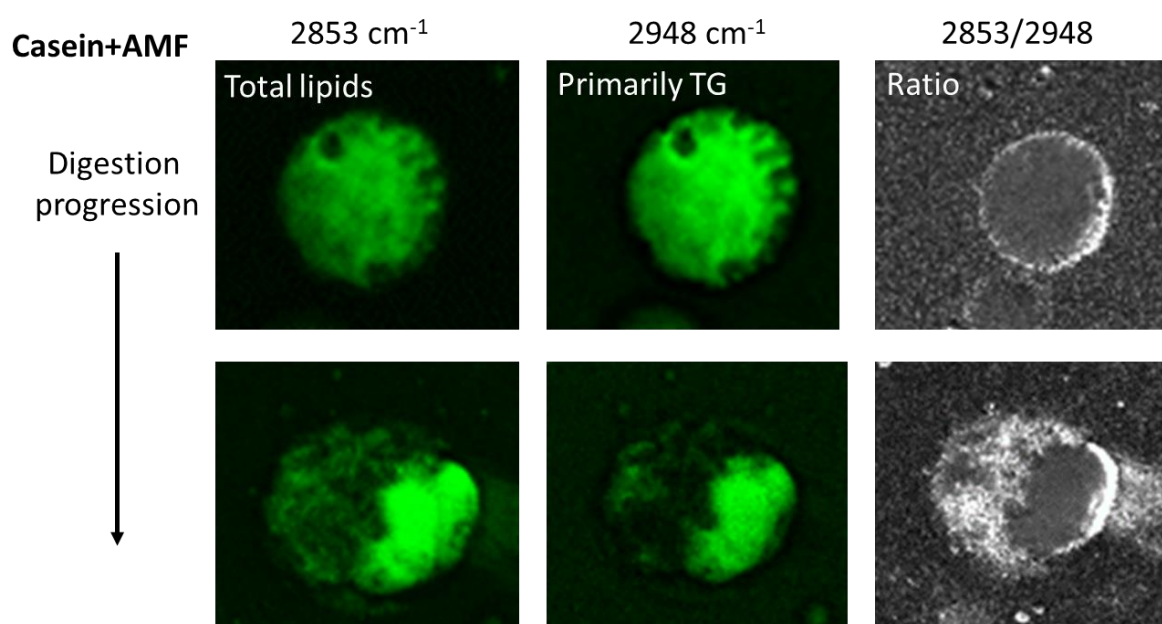

**Figure S3.** CARS microscopy images of casein-emulsified fat globules during digestion by pancreatic lipase, showing distributions of triglycerides (TG, middle column) and all lipids including the digestion products (left column); and the ratio between the two signals (right column).

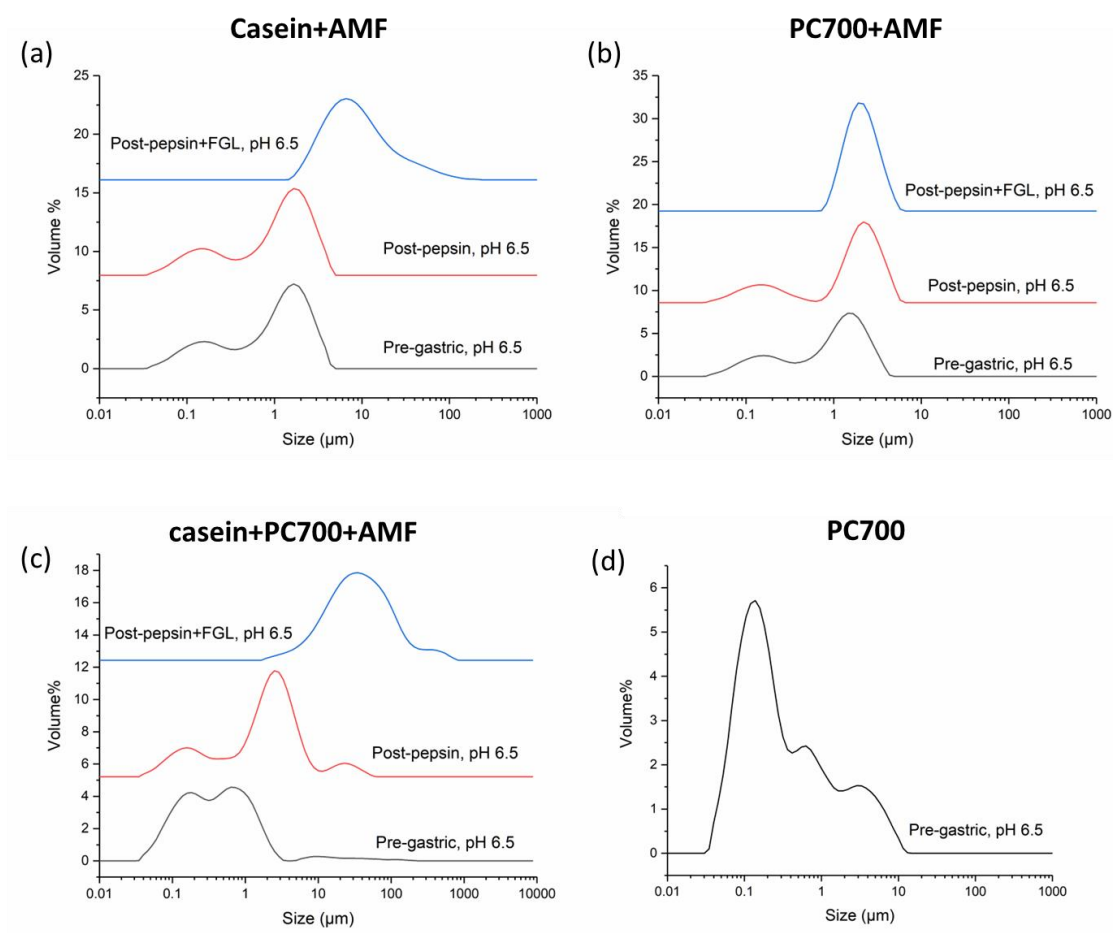

**Figure S4.** Particle size distributions of (a) 2 w/v% casein+AMF, (b) 2 w/v% PC700+AMF, and (c) 1 w/v% casein+1 w/v% PC700+AMF emulsions at pH 6.5 before and after gastric digestion with pepsin and fungal gastric lipase (FGL); and (d) PC700 in tris buffer.

**Table S2.** Lists of main liquid crystal structures formed (and their associated lattice parameters) after 60 min or 80 min digestion of casein-emulsified fat globules (casein+AMF) and PC700-emulsified fat globules (PC700+AMF) by pancreatic lipase at pH 6.5, with or without prior gastric step pre-treatment with pepsin and/or fungal gastric lipase (FGL). Milk was included for comparison purposes. Concentration of the emulsifiers was 2 w/v% and AMF was 3.8 w/v%.

| Samples    | Gastric pre-treatment | Liquid crystal phase formed after digestion by pancreatic lipase | Position of the first peak, $q$ ( $\text{\AA}^{-1}$ ) | Lattice parameter ( $\text{\AA}$ ) |
|------------|-----------------------|------------------------------------------------------------------|-------------------------------------------------------|------------------------------------|
| Casein+AMF | None                  | Lamellar                                                         | 0.13                                                  | 47                                 |
|            |                       | Hexagonal H <sub>2</sub>                                         | 0.11                                                  | 66                                 |
|            |                       | Bicontinuous cubic $Im3m$                                        | 0.05                                                  | 197                                |
|            | Pepsin                | Lamellar                                                         | 0.13                                                  | 47                                 |
|            |                       | Hexagonal H <sub>2</sub>                                         | 0.11                                                  | 66                                 |
|            |                       | Bicontinuous cubic $Im3m$                                        | 0.05                                                  | 197                                |
|            | FGL+pepsin            | Lamellar                                                         | 0.13                                                  | 47                                 |
|            |                       | Hexagonal H <sub>2</sub>                                         | 0.11                                                  | 66                                 |
|            |                       | Bicontinuous cubic $Im3m$                                        | 0.05                                                  | 189                                |
| PC700+AMF  | None                  | Lamellar                                                         | 0.13                                                  | 47                                 |
|            |                       | Hexagonal H <sub>2</sub>                                         | 0.10                                                  | 71                                 |
|            |                       | Bicontinuous cubic $Im3m$                                        | 0.04                                                  | 202                                |
|            | Pepsin                | Lamellar                                                         | 0.13                                                  | 48                                 |
|            |                       | Hexagonal H <sub>2</sub>                                         | 0.10                                                  | 70                                 |
|            |                       | Bicontinuous cubic $Im3m$                                        | 0.04                                                  | 202                                |
|            | FGL+pepsin            | Lamellar                                                         | 0.13                                                  | 48                                 |
|            |                       | Hexagonal H <sub>2</sub>                                         | 0.10                                                  | 70                                 |
|            |                       | Bicontinuous cubic $Im3m$                                        | 0.04                                                  | 202                                |
| Milk       | None                  | Lamellar                                                         | 0.14                                                  | 46                                 |
|            |                       | Hexagonal H <sub>2</sub>                                         | 0.11                                                  | 65                                 |
|            |                       | Bicontinuous cubic $Im3m$                                        | 0.05                                                  | 185                                |

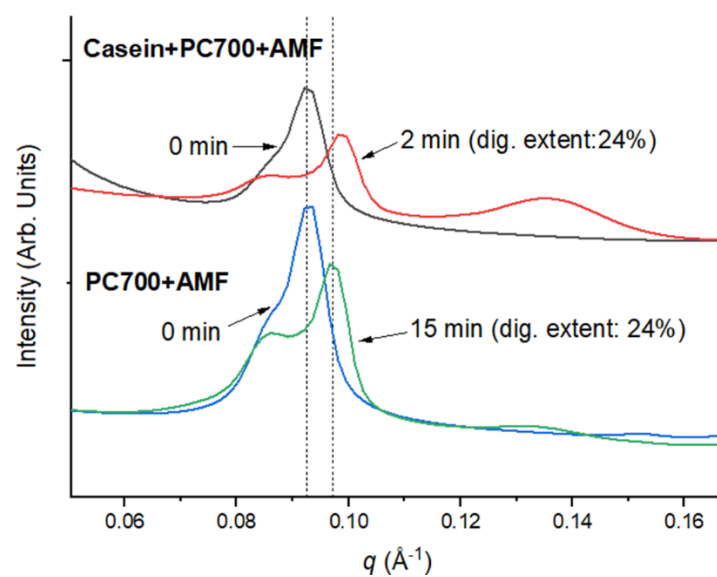

**Figure S5.** SAXS profiles of PC700- and casein+PC700-emulsified fat globules before digestion (0 min) and after digestion by pancreatic lipase (15 min for PC700 only and 2 min for casein+PC700) at pH 6.5.
